# Supplementary material
Source: PubMed Central journal article supplement (PMC4499788)
Supplement: Supp_Fig1.pdf [file Supp_Fig1.pdf]

## Supplementary Data

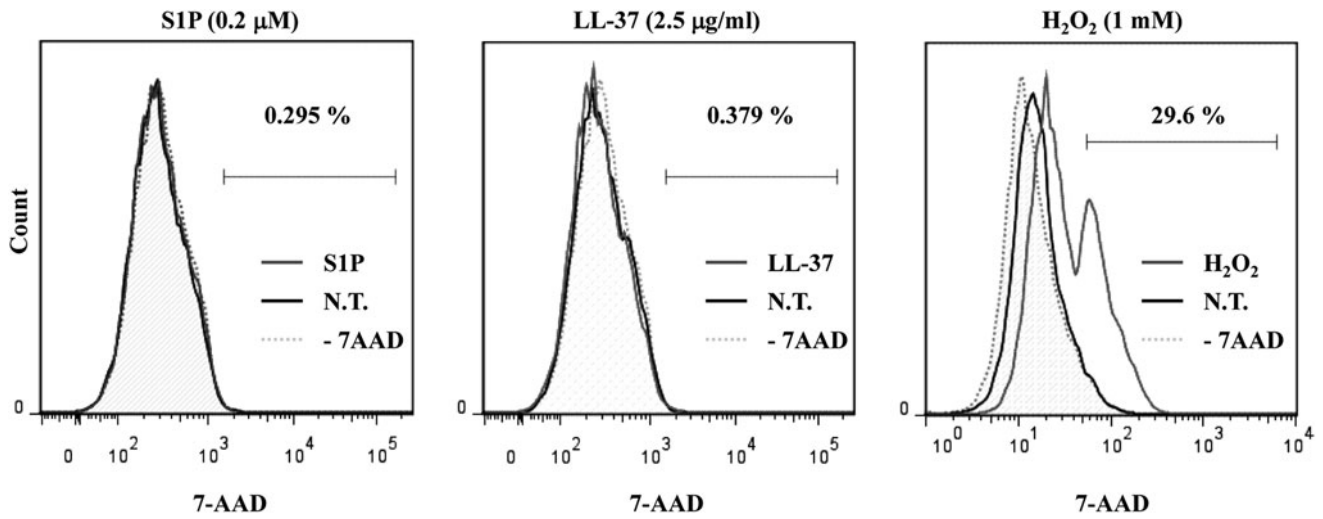

**SUPPLEMENTARY FIG. S1.** Flow cytometry analysis of 7-AAD stained cells after treatment of human cord blood-derived mesenchymal stem cells (hCB-MSCs) with 0.2  $\mu$ M sphingosine-1-phosphate (SIP) or 2.5  $\mu$ g/mL LL-37 for 3 h. For positive control, hCB-MSCs treated with 1 mM H<sub>2</sub>O<sub>2</sub> for 3 h were used. The percentage of 7-AAD-positive cells was shown in each FACS histogram.
