# Supplementary material
Source: PubMed Central journal article supplement (PMC4499788)
Supplement: Supp_Fig2.pdf [file Supp_Fig2.pdf]

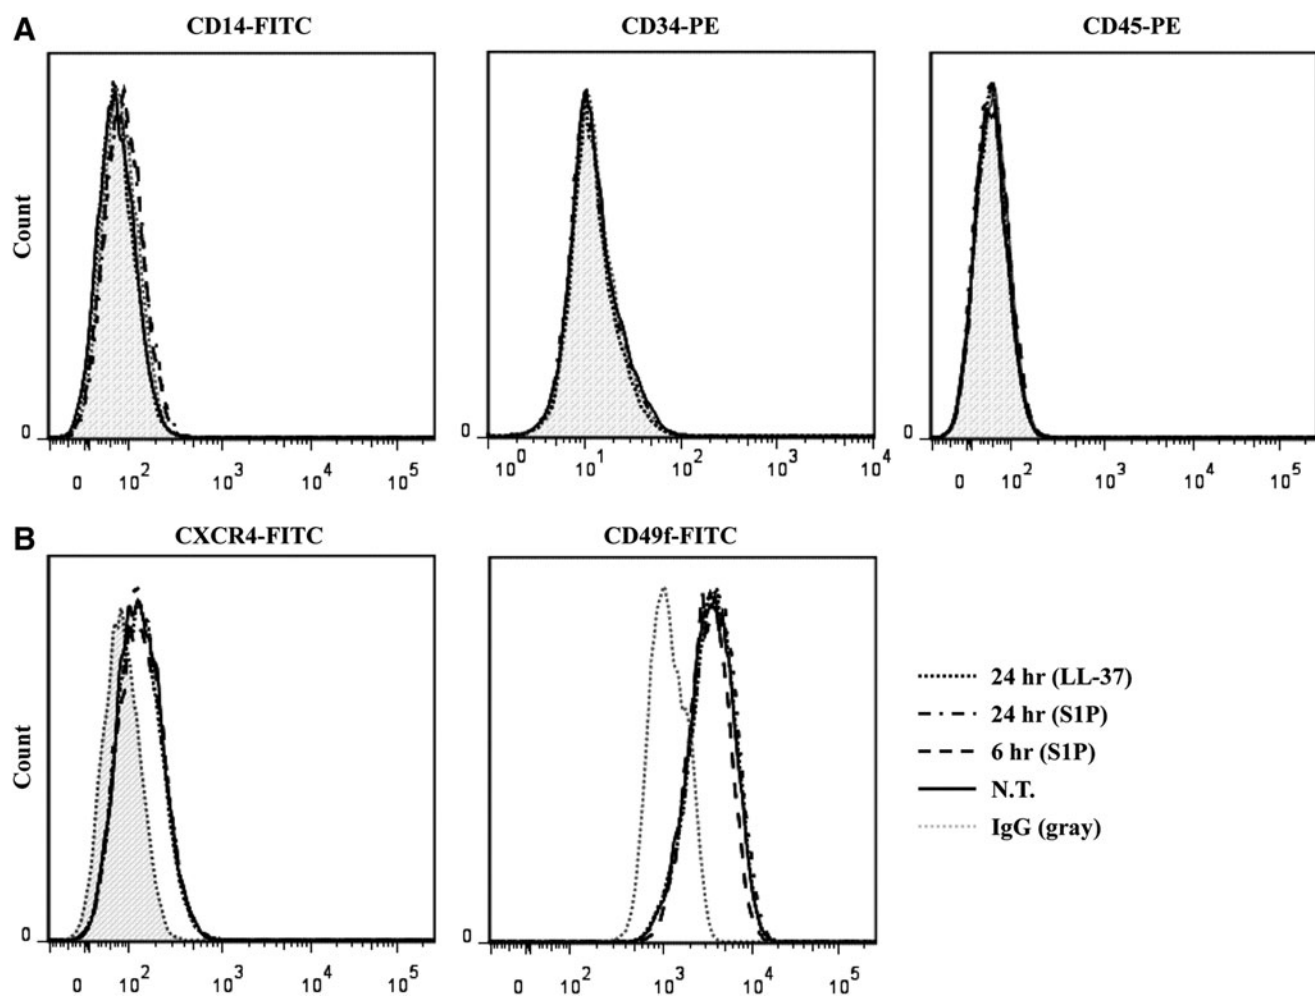

**SUPPLEMENTARY FIG. S2.** Flow cytometry analysis of hematopoietic lineage (A) and primitive MSCs enriched (B) surface proteins using hCB-MSCs after treatment with 0.2  $\mu$ M S1P or 2.5  $\mu$ g/mL LL-37 for the indicated amount of time.
