# Supplementary material
Source: PubMed Central journal article supplement (PMC4499788)
Supplement: Supp_Fig3.pdf [file Supp_Fig3.pdf]

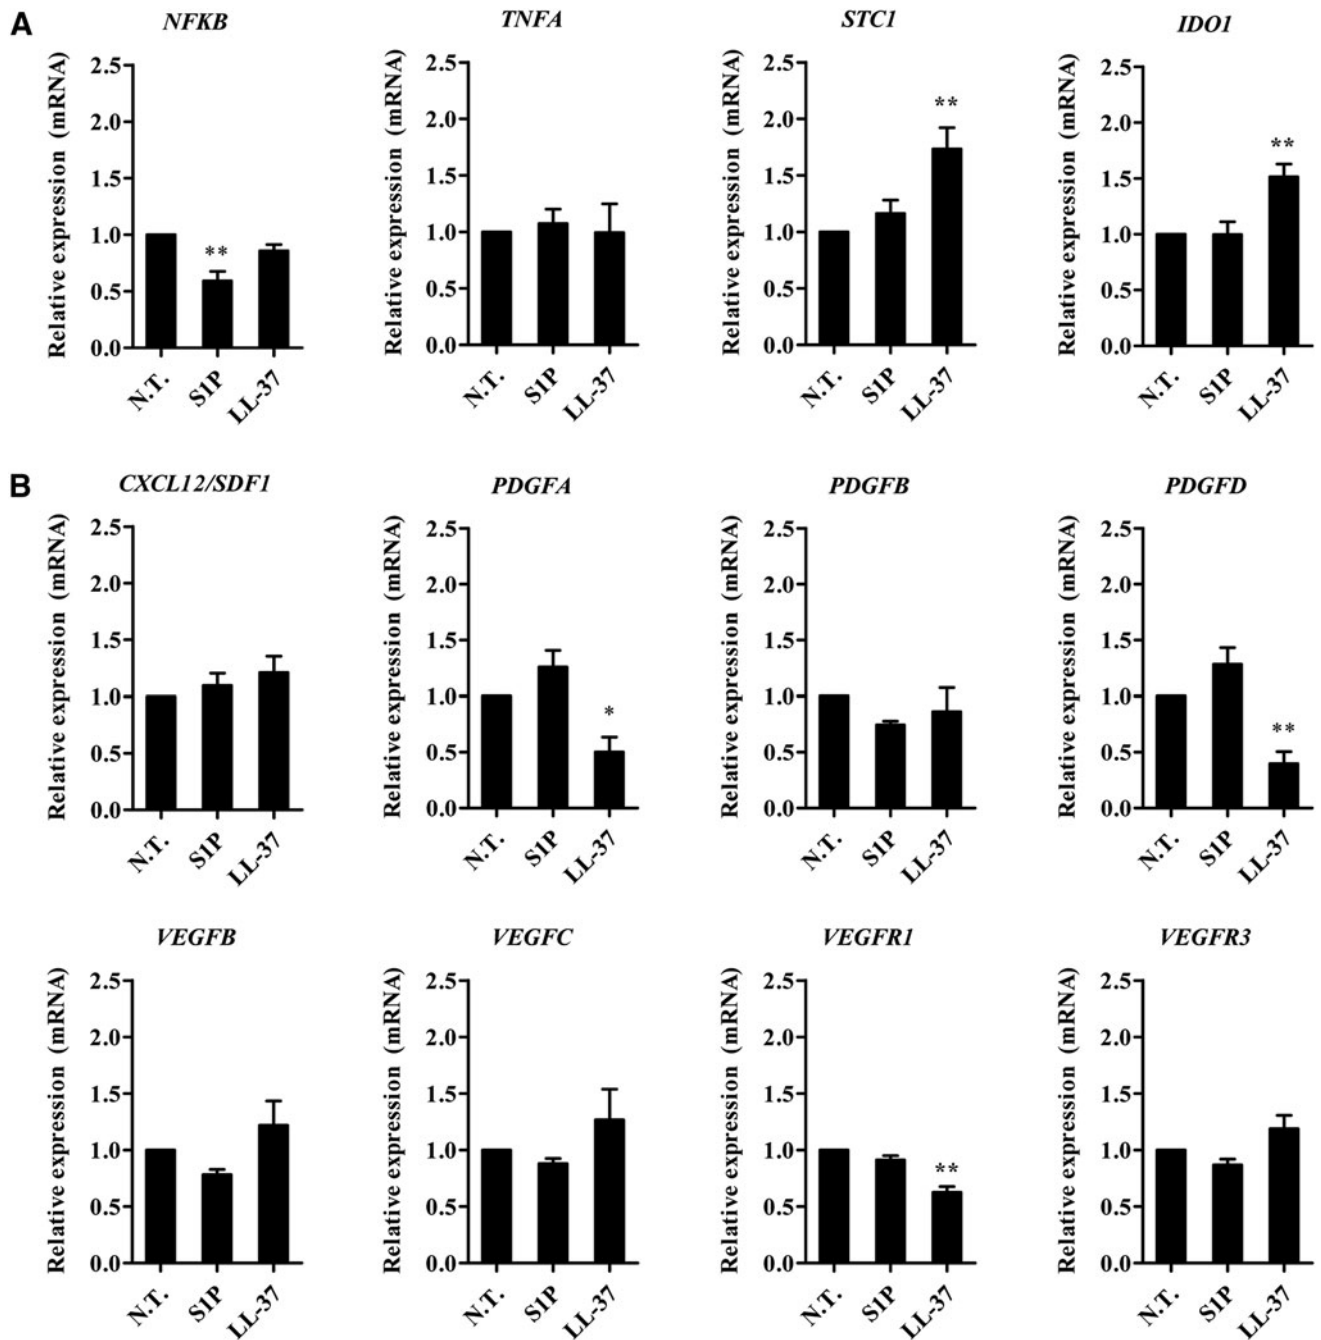

**SUPPLEMENTARY FIG. S3.** Real-time quantitative polymerase chain reaction (RQ-PCR) analysis of the inflammation- (A) and angiogenesis-related (B) genes in hCB-MSCs after treatment with 0.2  $\mu$ M S1P or 2.5  $\mu$ g/mL LL-37 for 24 h. The relative expression level of the indicated genes is represented as the fold change compared to the value of MSCs cultured without priming (N.T.) and are shown as mean  $\pm$  standard error of mean (SEM,  $n=5$ ); \* $P<0.05$ , \*\* $P<0.01$  compared to N.T. (one-way analysis of variance with Bonferroni post-test).
