# Supplementary material
Source: PubMed Central journal article supplement (PMC4499788)
Supplement: Supp_Fig4.pdf [file Supp_Fig4.pdf]

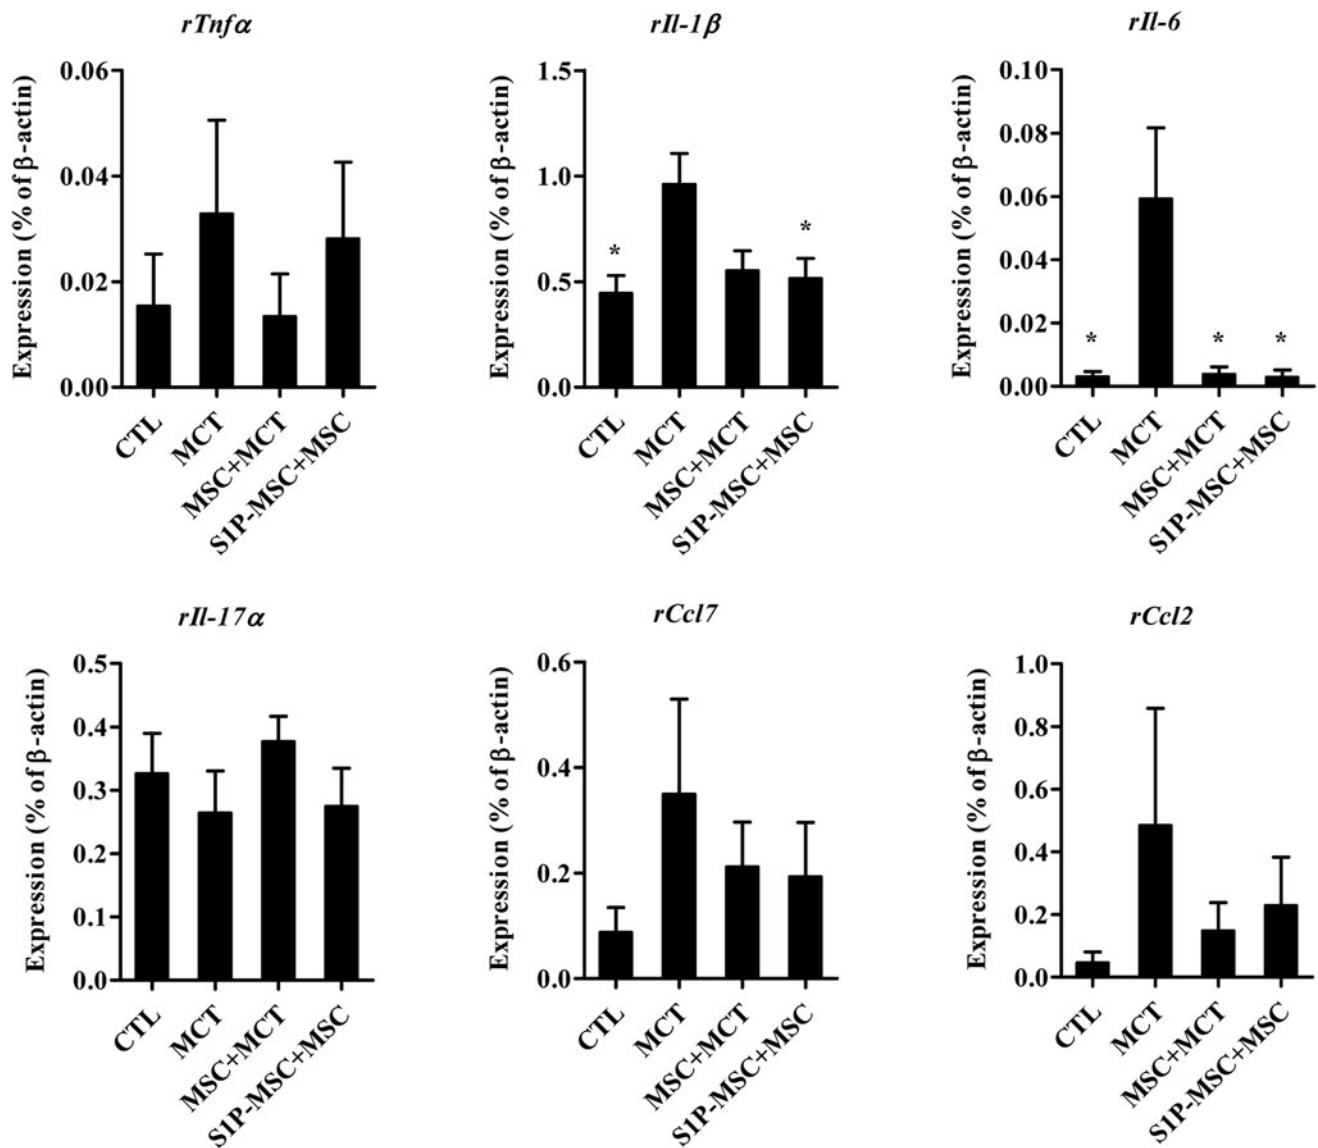

**SUPPLEMENTARY FIG. S4.** RQ-PCR analysis of transcripts that encode inflammatory cytokines in lungs from the indicated groups. The relative expression levels of these genes are presented as the relative fold changes compared to the value of the control rats (CTL) and are presented as mean  $\pm$  SEM ( $n=4$ ; \* $P < 0.05$  compared with CTL).
