# Supplementary material
Source: PubMed Central journal article supplement (PMC4499788)
Supplement: Supp_Fig5.pdf [file Supp_Fig5.pdf]

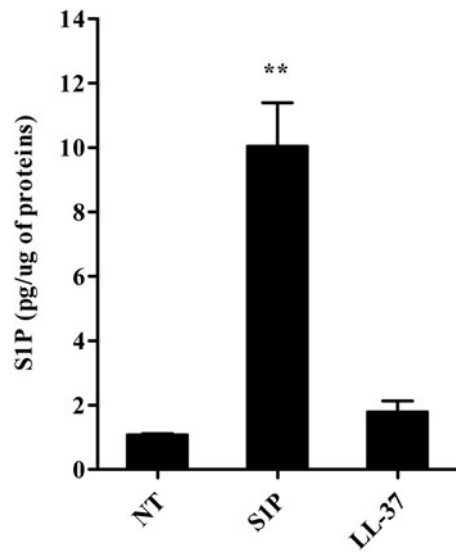

**SUPPLEMENTARY FIG. S5.** Quantification of S1P in the hCB-MSCs after treatment with 0.2  $\mu$ M S1P or 2.5  $\mu$ g/mL LL-37 for 24 h. S1P level was normalized to the total protein content in the samples. Data are presented as mean  $\pm$  SEM [ $n=4$ ; \*\* $P<0.01$  compared with MSCs cultured without priming (NT)].
